# Supplementary material for: Optimizing Job Coscheduling by Adaptive Deadlock-Free Scheduler
Source: Hindawi journal article supplement (doi:10.1155/2018/1438792), 2018-08-15
Supplement: f1 [file 1438792.f1.doc]

**Supporting Information**

# Optimizing Job Co-scheduling by Adaptive Deadlock-free Scheduler

Zhishuo Zheng*a,b, Deyu Qia, Mincong Yua, Xinyang Wanga, Naqin Zhouc, Yang Shena, Jing Guoa

**A. Data for Fig.2......................................................................2**

**B. Data for Fig.3.......................................................................3**

**C. Data for Fig.4……………………………………………...5**

**D. Data for Fig.5.......................................................................6**

1. **Data for Fig.2(a)-(c)**

**Fig.2(a)**

|  | Multi-path | | Deadlock-free | | Two level | |
| --- | --- | --- | --- | --- | --- | --- |
| Ojob | Per-job wait time speedup | Per-job wait time speedup | Per-job wait time speedup | Per-job wait time speedup | Per-job wait time speedup | Per-job wait time speedup |
| 1.00E-04 | 1.25 | 1.25 | 12.5 | 1.66667 | 0.312 | 0.0025 |
| 1.00E-03 | 5.75 | 5.75 | 57.5 | 7.66667 | 1.43838 | 8.14885 |
| 0.01 | 1.46465 | 50.75 | 507.5 | 67.66667 | 21.26951 | 10.13986 |
| 0.1 | 68.68561 | 61.1705 | 3.46023 | 124.2273 | 0.68699 | 0.12351 |
| 1 | 7.5839 | 105.075 | 19.68028 | 300 | 0.11677 | 0.40994 |
| 10 | 1.76096 | 187.5426 | 1.83865 | 237.7131 | 1.30136 | 3.74711 |

**Fig.2(b)**

|  | Multi-path | | Deadlock-free | | Two level | |
| --- | --- | --- | --- | --- | --- | --- |
| Ojob | Mean | Standard Deviation | Mean | Standard Deviation | Mean | Standard Deviation |
| 1.00E-04 | 0.15207 | 0.01186 | 0.05207 | 0.01186 | 0.5239 | 0.05232 |
| 2.00E-04 | 0.15208 | 0.01187 | 0.06374 | 0.01363 | 0.52391 | 0.05232 |
| 2.50E-04 | 0.15209 | 0.01188 | 0.06374 | 0.01362 | 0.52393 | 0.05232 |
| 3.00E-04 | 0.1521 | 0.01189 | 0.06374 | 0.01361 | 0.52394 | 0.05231 |
| 3.50E-04 | 0.1521 | 0.0119 | 0.06375 | 0.0136 | 0.52396 | 0.05231 |
| 4.00E-04 | 0.15211 | 0.01191 | 0.06375 | 0.01359 | 0.52397 | 0.05231 |
| 4.50E-04 | 0.15212 | 0.01192 | 0.06372 | 0.01357 | 0.52395 | 0.05236 |
| 5.00E-04 | 0.15213 | 0.01193 | 0.06372 | 0.01356 | 0.52396 | 0.05236 |
| 5.50E-04 | 0.15214 | 0.01194 | 0.06372 | 0.01354 | 0.52398 | 0.05235 |
| 6.00E-04 | 0.15215 | 0.01194 | 0.05212 | 0.01189 | 0.52399 | 0.05235 |
| 6.50E-04 | 0.15216 | 0.01195 | 0.05213 | 0.0119 | 0.52401 | 0.05235 |
| 7.00E-04 | 0.15217 | 0.01196 | 0.05217 | 0.01196 | 0.52405 | 0.05229 |
| 7.50E-04 | 0.15218 | 0.01197 | 0.05218 | 0.01197 | 0.52407 | 0.05229 |
| 8.00E-04 | 0.15219 | 0.01198 | 0.05219 | 0.01198 | 0.52408 | 0.05228 |
| 8.50E-04 | 0.1522 | 0.01199 | 0.0522 | 0.01199 | 0.52409 | 0.05228 |
| 9.00E-04 | 0.15221 | 0.012 | 0.05221 | 0.012 | 0.52411 | 0.05228 |
| 9.50E-04 | 0.15222 | 0.01201 | 0.05222 | 0.01201 | 0.52412 | 0.05227 |
| 1.00E-03 | 0.15299 | 0.01315 | 0.05299 | 0.01315 | 0.52562 | 0.05194 |
| 0.002 | 0.15548 | 0.01707 | 0.05548 | 0.01707 | 0.5332 | 0.05227 |
| 0.0025 | 0.16463 | 0.01483 | 0.06091 | 0.01982 | 0.54077 | 0.05262 |
| 0.003 | 0.17379 | 0.01265 | 0.06618 | 0.02334 | 0.54834 | 0.053 |
| 0.0035 | 0.17294 | 0.02479 | 0.07146 | 0.02721 | 0.55592 | 0.05339 |
| 0.004 | 0.17209 | 0.01279 | 0.0634 | 0.02241 | 0.53682 | 0.06594 |
| 0.0045 | 0.14791 | 0.00802 | 0.04867 | 0.00684 | 0.51773 | 0.0597 |
| 0.005 | 0.1104 | 0.00577 | 0.02061 | 0.01917 | 0.47864 | 0.05472 |
| 0.0055 | 0.12608 | 0.0148 | 0.03241 | 0.01661 | 0.49926 | 0.05144 |
| 0.006 | 0.13316 | 0.01045 | 0.03316 | 0.01045 | 0.50269 | 0.05277 |
| 0.0065 | 0.14691 | 0.0038 | 0.04691 | 0.0038 | 0.51279 | 0.06 |
| 0.007 | 0.14701 | 0.00334 | 0.04702 | 0.00335 | 0.51227 | 0.05973 |
| 0.0075 | 0.14508 | 0.00418 | 0.04508 | 0.00419 | 0.51033 | 0.05659 |
| 0.008 | 0.14816 | 0.00872 | 0.04816 | 0.00872 | 0.51643 | 0.06153 |
| 0.0085 | 0.14447 | 0.00212 | 0.04448 | 0.00212 | 0.51165 | 0.05852 |

**Fig2(c)**

|  | Multi-path | Deadlock-free | Two level |
| --- | --- | --- | --- |
| Number of Submitted jobs | job runtime to completion speedup | job runtime to completion speedup | job runtime to completion speedup |
| 100 | 1.23214 | 1.73611 | 1.4366 |
| 1000 | 1.10408 | 2.09605 | 2.04024 |
| 10000 | 1.11757 | 1.35094 | 0.9552 |
| 100000 | 1.12098 | 1.31975 | 0.94565 |

**B、Data for Fig3**

| Ojob | Job abandoned |
| --- | --- |
| 1E-4 | 16 |
| 2E-4 | 16 |
| 2.5E-4 | 15 |
| 3E-4 | 15 |
| 3.5E-4 | 16 |
| 4E-4 | 17 |
| 4.5E-4 | 16 |
| 5E-4 | 16 |
| 5.5E-4 | 17 |
| 6E-4 | 16 |
| 6.5E-4 | 17 |
| 7E-4 | 17 |
| 7.5E-4 | 17 |
| 8E-4 | 17 |
| 8.5E-4 | 16 |
| 9E-4 | 16 |
| 9.5E-4 | 16 |
| 1E-3 | 15 |
| 0.002 | 16 |
| 0.0025 | 15 |
| 0.003 | 17 |
| 0.0035 | 16 |
| 0.004 | 17 |
| 0.0045 | 16 |
| 0.005 | 17 |
| 0.0055 | 17 |
| 0.006 | 16 |
| 0.0065 | 16 |
| 0.007 | 17 |
| 0.0075 | 15 |
| 0.008 | 16 |
| 0.0085 | 16 |
| 0.009 | 16 |
| 0.0095 | 16 |
| 0.01 | 16 |
| 0.02 | 18 |
| 0.03 | 16 |
| 0.08 | 16 |
| 0.1 | 18 |
| 0.25 | 33 |
| 0.3 | 35 |
| 0.35 | 41 |
| 0.4 | 35 |
| 0.45 | 34 |
| 0.5 | 40 |
| 0.55 | 32 |
| 0.6 | 37 |
| 0.65 | 42 |
| 0.7 | 39 |
| 0.75 | 32 |
| 0.8 | 30 |
| 0.85 | 34 |
| 0.9 | 39 |
| 0.95 | 34 |
| 1 | 40 |
| 2 | 41 |
| 2.5 | 43 |
| 3 | 39 |
| 3.5 | 39 |
| 4 | 36 |
| 4.5 | 33 |
| 5 | 35 |
| 5.5 | 41 |
| 6 | 35 |
| 6.5 | 34 |
| 7 | 40 |
| 7.5 | 34 |
| 8 | 39 |
| 8.5 | 34 |
| 9 | 40 |
| 9.5 | 41 |
| 10 | 43 |
| 10.5 | 39 |

**C、Data for Fig4(a)-(c)**

**Fig4(a)**

| Otask | 1E-4 | 1E-3 | 0.01 | 0.1 | 1 | Ojob |
| --- | --- | --- | --- | --- | --- | --- |
| 0.1 | 0.81909 | 0.8191 | 0.81916 | 0.81978 | 0.82603 | 1 |
| 0.01 | 0.6118 | 0.6118 | 0.61187 | 0.61249 | 0.61874 | 0.1 |
| 1E-3 | 0.30107 | 0.30108 | 0.30114 | 0.30176 | 0.30801 | 0.01 |
| 1E-4 | 0.29962 | 0.21002 | 0.21065 | 0.2169 | 0.2794 | 1E-3 |
| 1E-5 | 0.09889 | 0.09952 | 0.10536 | 0.10683 | 0.10793 | 1E-4 |

**Fig4(b)**

| Otask | 1E-4 | 1E-3 | 0.01 | 0.1 | 1 | Ojob |
| --- | --- | --- | --- | --- | --- | --- |
| 0.1 | 0.72842 | 0.72843 | 0.72854 | 0.74092 | 0.85342 | 1 |
| 0.01 | 0.63467 | 0.63468 | 0.63479 | 0.64717 | 0.75967 | 0.1 |
| 1E-3 | 0.22529 | 0.22531 | 0.22542 | 0.23779 | 0.35029 | 0.01 |
| 1E-4 | 0.12436 | 0.12437 | 0.12448 | 0.13686 | 0.24936 | 1E-3 |
| 1E-5 | 0.07426 | 0.07427 | 0.07439 | 0.08675 | 0.19926 | 1E-4 |

Fig4(c)

| Otask | 1E-4 | 1E-3 | 0.01 | 0.1 | 1 | Ojob |
| --- | --- | --- | --- | --- | --- | --- |
| 0.1 | 0.61226 | 0.61235 | 0.61305 | 0.6205 | 0.70779 | 1 |
| 0.01 | 0.41253 | 0.41261 | 0.4335 | 0.42079 | 0.49516 | 0.1 |
| 1E-3 | 0.20021 | 0.20096 | 0.20839 | 0.28277 | 0.39434 | 0.01 |
| 1E-4 | 0.10013 | 0.10021 | 0.10095 | 0.10839 | 0.12265 | 1E-3 |
| 1E-5 | 0.03002 | 0.0301 | 0.04384 | 0.03828 | 0.05265 | 1E-4 |

**D、Data for Fig5(a)-(b)**

**Fig5(a)**

| Arrival_time | per-job wait time(CPU intensive) | per-job wait time(I/O intensive) |
| --- | --- | --- |
| 0.002 | 6.98E-04 | 2.50E-04 |
| 0.00237 | 0.00103 | 2.55E-04 |
| 0.0024 | 0.00108 | 2.59E-04 |
| 0.00244 | 0.00112 | 2.64E-04 |
| 0.00248 | 0.00118 | 2.68E-04 |
| 0.00253 | 0.00123 | 2.73E-04 |
| 0.00257 | 0.00128 | 2.78E-04 |
| 0.00262 | 0.00135 | 2.81E-04 |
| 0.00267 | 0.00142 | 2.86E-04 |
| 0.00272 | 0.0015 | 2.91E-04 |
| 0.00278 | 0.00157 | 2.95E-04 |
| 0.00283 | 0.00165 | 3.00E-04 |
| 0.00289 | 0.00174 | 3.04E-04 |
| 0.00295 | 0.00185 | 3.07E-04 |
| 0.00302 | 0.00195 | 3.11E-04 |
| 0.00308 | 0.00205 | 3.14E-04 |
| 0.00315 | 0.00216 | 3.18E-04 |
| 0.00322 | 0.00229 | 3.22E-04 |
| 0.00329 | 0.00242 | 3.24E-04 |
| 0.00337 | 0.00255 | 3.26E-04 |
| 0.00344 | 0.00269 | 3.28E-04 |
| 0.00352 | 0.00283 | 3.29E-04 |
| 0.0036 | 0.00299 | 3.31E-04 |
| 0.00369 | 0.00315 | 3.31E-04 |
| 0.00377 | 0.0033 | 3.33E-04 |
| 0.00386 | 0.00346 | 3.33E-04 |
| 0.00395 | 0.00363 | 3.33E-04 |
| 0.00404 | 0.0038 | 3.35E-04 |
| 0.00414 | 0.00396 | 3.35E-04 |
| 0.00424 | 0.00413 | 3.33E-04 |
| 0.00433 | 0.0043 | 3.33E-04 |
| 0.00443 | 0.00448 | 3.33E-04 |
| 0.00454 | 0.00464 | 3.33E-04 |
| 0.00464 | 0.00478 | 3.31E-04 |
| 0.00475 | 0.00495 | 3.31E-04 |
| 0.00486 | 0.00509 | 3.29E-04 |
| 0.00497 | 0.00525 | 3.29E-04 |
| 0.00508 | 0.00537 | 3.28E-04 |
| 0.0052 | 0.0055 | 3.26E-04 |
| 0.00531 | 0.00566 | 3.26E-04 |
| 0.00543 | 0.0058 | 3.24E-04 |
| 0.00555 | 0.00593 | 3.24E-04 |
| 0.00567 | 0.00604 | 3.22E-04 |
| 0.0058 | 0.00618 | 3.22E-04 |
| 0.00592 | 0.00633 | 3.20E-04 |
| 0.00604 | 0.00644 | 3.20E-04 |
| 0.00617 | 0.00659 | 3.20E-04 |
| 0.0063 | 0.00671 | 3.18E-04 |
| 0.00642 | 0.00687 | 3.18E-04 |
| 0.00655 | 0.00699 | 3.18E-04 |
| 0.00668 | 0.00716 | 3.18E-04 |
| 0.00681 | 0.00733 | 3.20E-04 |
| 0.00694 | 0.0075 | 3.20E-04 |
| 0.00707 | 0.00768 | 3.20E-04 |
| 0.0072 | 0.00786 | 3.22E-04 |
| 0.00733 | 0.0081 | 3.24E-04 |
| 0.00747 | 0.00829 | 3.26E-04 |
| 0.0076 | 0.00854 | 3.26E-04 |
| 0.00773 | 0.00879 | 3.28E-04 |
| 0.00787 | 0.0091 | 3.31E-04 |
| 0.008 | 0.00938 | 3.33E-04 |
| 0.00813 | 0.00977 | 3.37E-04 |
| 0.00827 | 0.01012 | 3.39E-04 |
| 0.0084 | 0.01054 | 3.43E-04 |
| 0.00853 | 0.01098 | 3.47E-04 |
| 0.00867 | 0.01144 | 3.51E-04 |
| 0.0088 | 0.01199 | 3.58E-04 |
| 0.00893 | 0.01257 | 3.62E-04 |
| 0.00906 | 0.01325 | 3.66E-04 |
| 0.0092 | 0.01389 | 3.70E-04 |
| 0.00933 | 0.01473 | 3.77E-04 |
| 0.00946 | 0.01552 | 3.82E-04 |
| 0.0096 | 0.01646 | 3.86E-04 |
| 0.00973 | 0.01746 | 3.91E-04 |
| 0.00986 | 0.01851 | 3.95E-04 |
| 0.01 | 0.01974 | 4.02E-04 |
| 0.01013 | 0.02106 | 4.07E-04 |
| 0.01026 | 0.02259 | 4.12E-04 |
| 0.0104 | 0.02424 | 4.14E-04 |
| 0.01053 | 0.02601 | 4.19E-04 |
| 0.01067 | 0.02807 | 4.24E-04 |
| 0.0108 | 0.03011 | 4.26E-04 |
| 0.01093 | 0.03269 | 4.31E-04 |
| 0.01107 | 0.03528 | 4.34E-04 |
| 0.0112 | 0.0383 | 4.37E-04 |
| 0.01133 | 0.04158 | 4.37E-04 |
| 0.01147 | 0.0454 | 4.39E-04 |
| 0.0116 | 0.04957 | 4.39E-04 |
| 0.01173 | 0.05413 | 4.39E-04 |
| 0.01187 | 0.05946 | 4.39E-04 |
| 0.012 | 0.0653 | 4.39E-04 |
| 0.01213 | 0.07173 | 4.37E-04 |
| 0.01227 | 0.07925 | 4.34E-04 |
| 0.0124 | 0.08755 | 4.29E-04 |
| 0.01253 | 0.09673 | 4.26E-04 |
| 0.01267 | 0.1075 | 4.24E-04 |
| 0.0128 | 0.11877 | 4.19E-04 |
| 0.01293 | 0.13199 | 4.12E-04 |
| 0.01307 | 0.14668 | 4.07E-04 |
| 0.0132 | 0.16301 | 3.97E-04 |
| 0.01333 | 0.18116 | 3.91E-04 |
| 0.01347 | 0.20133 | 3.84E-04 |
| 0.0136 | 0.22374 | 3.75E-04 |
| 0.01373 | 0.24865 | 3.66E-04 |
| 0.01387 | 0.27633 | 3.58E-04 |
| 0.014 | 0.30709 | 3.49E-04 |
| 0.01413 | 0.34128 | 3.39E-04 |
| 0.01427 | 0.37705 | 3.31E-04 |
| 0.0144 | 0.41903 | 3.22E-04 |
| 0.01453 | 0.46295 | 3.14E-04 |
| 0.01467 | 0.51148 | 3.05E-04 |
| 0.0148 | 0.5651 | 2.98E-04 |
| 0.01493 | 0.62068 | 2.90E-04 |
| 0.01507 | 0.68575 | 2.83E-04 |
| 0.0152 | 0.7488 | 2.76E-04 |
| 0.01533 | 0.82245 | 2.68E-04 |
| 0.01547 | 0.89282 | 2.62E-04 |
| 0.0156 | 0.97491 | 2.56E-04 |
| 0.01573 | 1.05832 | 2.52E-04 |
| 0.01587 | 1.14215 | 2.46E-04 |
| 0.016 | 1.23263 | 2.41E-04 |
| 0.01613 | 1.32249 | 2.37E-04 |
| 0.01627 | 1.4189 | 2.33E-04 |
| 0.0164 | 1.51344 | 2.30E-04 |
| 0.01653 | 1.61428 | 2.28E-04 |
| 0.01667 | 1.71177 | 2.25E-04 |
| 0.01679 | 1.81515 | 2.22E-04 |
| 0.01693 | 1.91352 | 2.22E-04 |
| 0.01705 | 2.00543 | 2.21E-04 |
| 0.01718 | 2.11411 | 2.21E-04 |
| 0.01731 | 2.20269 | 2.21E-04 |
| 0.01743 | 2.30849 | 2.22E-04 |
| 0.01756 | 2.39116 | 2.24E-04 |
| 0.01768 | 2.49135 | 2.25E-04 |
| 0.0178 | 2.58056 | 2.28E-04 |
| 0.01792 | 2.67298 | 2.32E-04 |
| 0.01803 | 2.75251 | 2.36E-04 |
| 0.01815 | 2.8344 | 2.41E-04 |
| 0.01826 | 2.91874 | 2.47E-04 |
| 0.01837 | 2.98801 | 2.53E-04 |
| 0.01847 | 3.05892 | 2.62E-04 |
| 0.01857 | 3.13152 | 2.70E-04 |

**Fig5(b)**.

|  | **CPU-intensive** | | **I/O-intensive** | |
| --- | --- | --- | --- | --- |
|  | Mean | Standard Deviation | Mean | Standard Deviation |
| 0.02 | 0.01723 | 0.0147 | 0.04053 | 0.02936 |
| 0.03 | 0.05785 | 0.01446 | 0.05235 | 0.04795 |
| 0.04 | 0.0458 | 0.00494 | 0.03392 | 0.02174 |
| 0.05 | 0.03575 | 0.00588 | 0.02099 | 0.00332 |
| 0.06 | 0.09126 | 0.00707 | 0.02426 | 0.00779 |
| 0.07 | 0.08247 | 0.00707 | 0.02365 | 0.00679 |
| 0.08 | 0.06058 | 0.00267 | 0.02329 | 0.00614 |
| 0.09 | 0.05011 | 0.00115 | 0.02328 | 0.00615 |
| 0.1 | 0.0363 | 0.00707 | 0.02194 | 0.0061 |
| 0.11 | 0.0563 | 0.00707 | 0.04618 | 0.02063 |
| 0.12 | 0.09126 | 0.00707 | 0.02329 | 0.00614 |
| 0.16 | 0.11065 | 0.00707 | 0.02328 | 0.00615 |
| 0.25 | 0.11004 | 0.00707 | 0.03194 | 0.0061 |
| 0.35 | 0.11943 | 0.00707 | 0.04618 | 0.02063 |
| 0.45 | 0.13422 | 0.01385 | 0.06507 | 0.00636 |
| 0.55 | 0.27116 | 0.00763 | 0.04818 | 0.00158 |
| 0.65 | 0.26077 | 0.00707 | 0.0295 | 0.00296 |
| 0.75 | 0.28076 | 0.00707 | 0.0363 | 0.01522 |
| 0.85 | 0.29077 | 0.00707 | 0.02613 | 0.00182 |
| 0.95 | 0.30077 | 0.00707 | 0.07489 | 0.01505 |
| 1.2 | 0.33076 | 0.00707 | 0.10507 | 0.00636 |
